# Supplementary material
Source: MDPI journal article supplement (https://www.mdpi.com/2313-4321/9/3/39)
Supplement: s1 [file s1]

# Rapid Waste Motor Oil Conversion into Diesel-Range Hydrocarbons Using Hydrochar as Catalyst: Kinetic Study and Product Characterization

Herman A. Murillo <sup>1</sup>, Evelyn Juiña <sup>1</sup>, Karla Vizuete <sup>2</sup>, Alexis Debut <sup>2</sup>, Daniel Echeverría <sup>3</sup>, Sebastian Taco-Vasquez <sup>3</sup> and Sebastian Ponce <sup>1,\*</sup>

<sup>1</sup> Department of Chemical Engineering, Universidad San Francisco de Quito USFQ, Diego de Robles s/n y Av. Interoceánica, Quito 170901, Ecuador; hmurillor@usfq.edu.ec (H.A.M.); ejuinaj@alumni.usfq.edu.ec (E.J.)

<sup>2</sup> Centro de Nanociencia y Nanotecnología, Universidad de las Fuerzas Armadas ESPE, Av. General Rumiñahui s/n y Ambato, Sangolquí 171103, Ecuador; ksvizuete@espe.edu.ec (K.V.); apdebut@espe.edu.ec (A.D.)

<sup>3</sup> Department of Chemical Engineering, Escuela Politécnica Nacional, Ladrón de Guevara E11-253, Quito 170525, Ecuador; daniel.echeverria@epn.edu.ec (D.E.); sebastian.taco@epn.edu.ec (S.T.-V.)

\* Correspondence: sponce@usfq.edu.ec

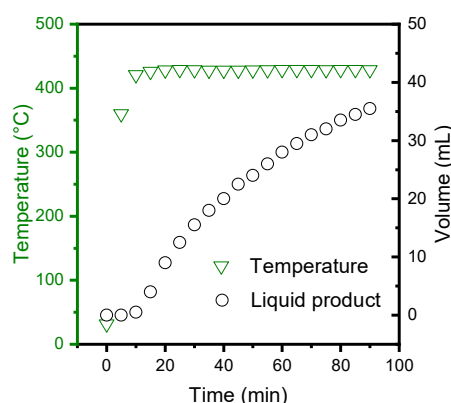

Figure S1. Exemplary temperature and volume of condensate vs. time curves during thermal cracking of WMO. Reaction conditions: Temperature: 420 °C, 40 g of WMO, 0.4 wt% of catalyst.

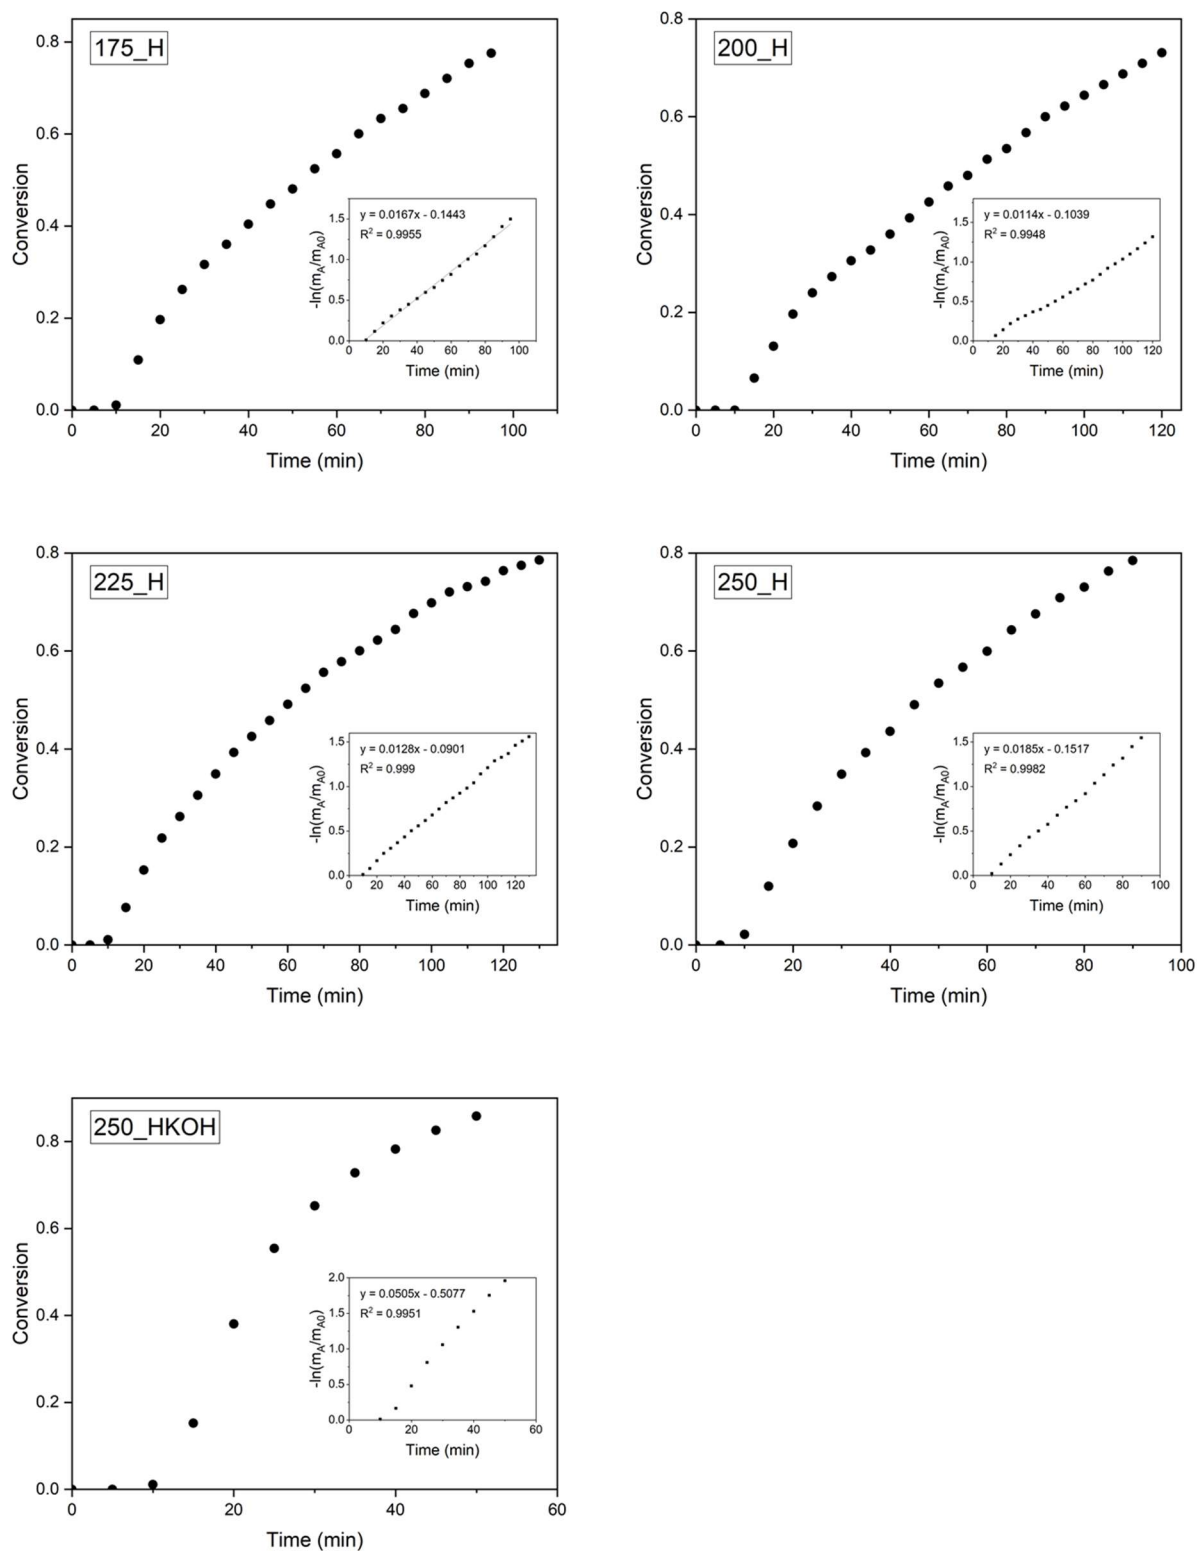

Figure S2. Conversion vs. time curves for 175\_H, 200\_H, 225\_H, 250\_H, and 250\_HKOH catalysts. Inset plots: kinetic constant calculation.

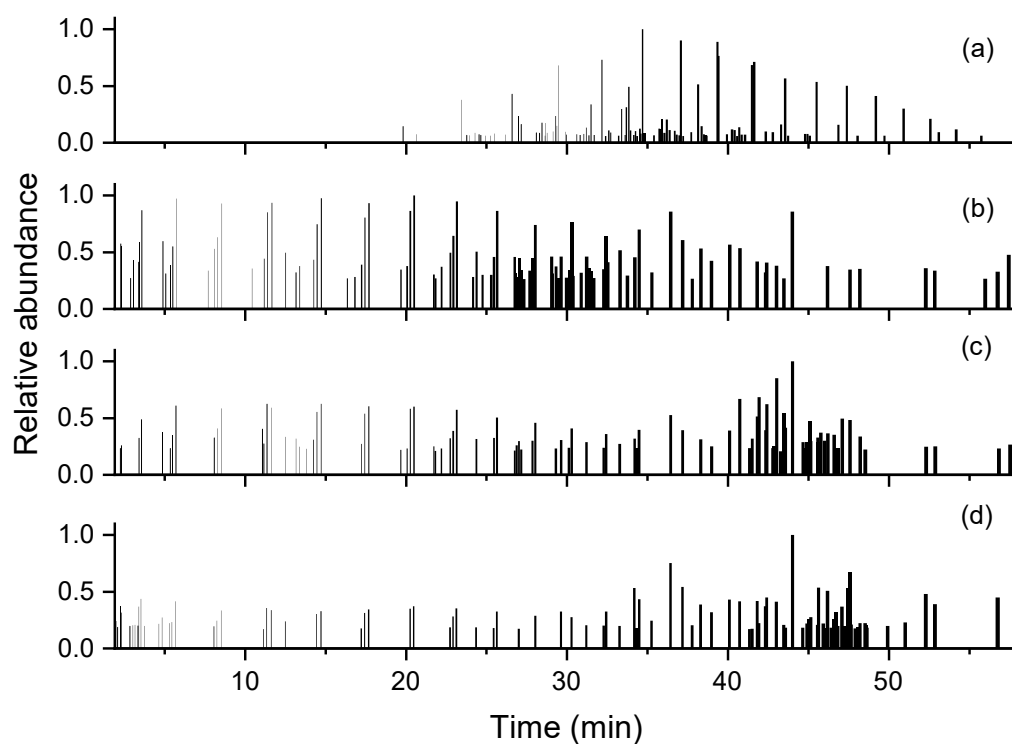

Figure S3. GC-MS chromatograms: a) commercial diesel, b) DLF from thermal cracking, c) DLF from 175\_HKOH, and d) DLF from 250\_HKOH.

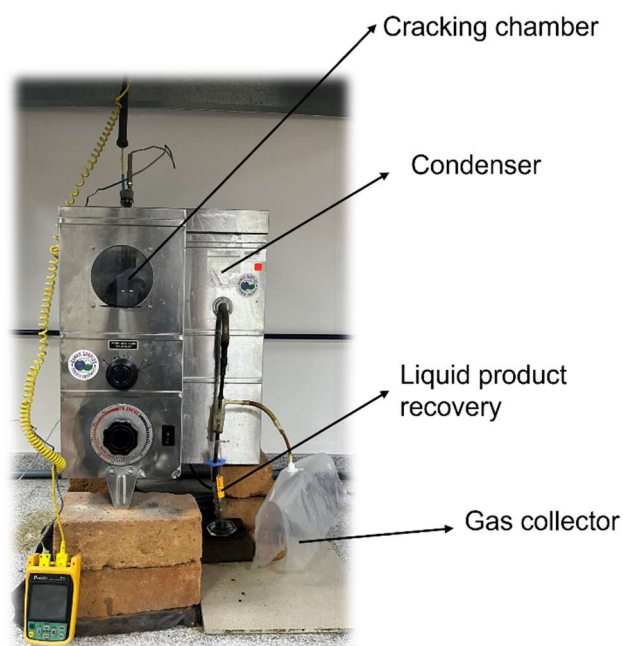

Figure S4. Picture of the cracking setup used in this study
